# Supplementary material for: Synthesis of trifluoromethyl-substituted pyrazolo[4,3-c]pyridines – sequential versus multicomponent reaction approach
Source: publisher site journal article supplement (doi:10.3762/bjoc.10.183), 2014-07-31
Supplement: Additional file 1 [file 1860-5397-10-183-S1.pdf]

## Supporting Information

for

### Synthesis of trifluoromethyl-substituted pyrazolo[4,3-*c*]pyridines – sequential versus multicomponent reaction approach

Barbara Palka<sup>1</sup>, Angela Di Capua<sup>1,2</sup>, Maurizio Anzini<sup>2</sup>, Gytė Vilkauskaitė<sup>1,3</sup>, Algirdas Šačkus<sup>3</sup>  
and Wolfgang Holzer,<sup>1\*</sup>

Address: <sup>1</sup>Division of Drug Synthesis, Department of Pharmaceutical Chemistry, Faculty of Life Sciences, University of Vienna, Althanstrasse 14, A-1090 Vienna, Austria, <sup>2</sup>Department of Biotechnology, Chemistry and Pharmacy, University of Siena, I-53100, Siena, Italy and <sup>3</sup>Institute of Synthetic Chemistry, Kaunas University of Technology, LT-50254 Kaunas, Lithuania

Email: Wolfgang Holzer\* - [wolfgang.holzer@univie.ac.at](mailto:wolfgang.holzer@univie.ac.at)

\*Corresponding author

### Experimental details and characterization data

#### 1. General

Melting points were determined on a Reichert–Kofler hot-stage microscope and are uncorrected. Mass spectra were obtained on a Shimadzu QP 1000 instrument (EI, 70 eV) and on a Bruker maXis 4G instrument (ESI-TOF, HRMS). IR spectra were recorded on a Perkin-Elmer FTIR 1605 spectrophotometer. <sup>1</sup>H, <sup>13</sup>C, <sup>15</sup>N and <sup>19</sup>F NMR spectra were recorded with a Bruker Avance III 400 spectrometer (400 MHz for <sup>1</sup>H, 100 MHz for <sup>13</sup>C, 40 MHz for <sup>15</sup>N, 376 MHz for <sup>19</sup>F) or a Bruker Avance 500 spectrometer (500 MHz for <sup>1</sup>H, 125 MHz for <sup>13</sup>C, 50 MHz for <sup>15</sup>N, 470 MHz for <sup>19</sup>F) at 297 K using “directly” detecting broadband observe (BBFO) probes. The center of the solvent signal was used as an internal standard which was related to TMS with  $\delta$  7.26 ppm (<sup>1</sup>H in CDCl<sub>3</sub>) and  $\delta$  77.0 ppm (<sup>13</sup>C in CDCl<sub>3</sub>). <sup>15</sup>N NMR spectra (gs-HMBC, gs-HSQC) were referenced against neat, external nitromethane, <sup>19</sup>F NMR spectra by absolute referencing via  $\mathcal{E}$  ratio. Digital resolutions were 0.25 Hz/data point in the

$^1\text{H}$  and 0.4 Hz/data point in the  $^1\text{H}$ -coupled  $^{13}\text{C}$ -NMR spectra (gated decoupling). For the microwave reactions an Anton Paar Synthos 3000 oven was employed. For column chromatographic separations Merck Kieselgel 60 (70-230 mesh) was used. Light petroleum refers to the fraction with boiling point 40–65 °C. Yields are not optimized.

## 2. 5-Chloro-1-phenyl-3-(trifluoromethyl)-1H-pyrazole-4-carbaldehyde (**2**)

Phosphorus oxychloride (21.47 g, 140.0 mmol) was slowly added to dimethylformamide (2.56 g, 35.0 mmol) at 0 °C while stirring, then 1-phenyl-3-(trifluoromethyl)-1H-pyrazol-5-ol (**1**) (8.00 g, 35.0 mmol) was added and the mixture was heated at 95 °C for 4.5 h. After cooling to rt, it was slowly poured into ice-water (200 mL) under vigorous stirring, in the process an orange oil was formed. The mixture was extracted with EtOAc (3×50 mL), the combined organic phases were washed with brine, 5% aq  $\text{NaHCO}_3$  solution and brine (each 30 mL), dried over anhydrous  $\text{Na}_2\text{SO}_4$  and evaporated under reduced pressure. The residue was subjected to column chromatography ( $\text{SiO}_2$ , EtOAc/light petroleum 1:1) to afford 8.65 g (90 %) of a colorless oil which slowly solidified while standing: mp 34–36 °C.  $^1\text{H}$  NMR (500 MHz,  $\text{CDCl}_3$ ):  $\delta$  7.56 (m, 5H, Ph H), 10.06 (s, 1H, CHO) ppm.  $^{13}\text{C}$  NMR (125 MHz,  $\text{CDCl}_3$ ):  $\delta$  116.6 ( $^2J_{\text{C4,CHO}} = 28.9$  Hz, C-4), 120.1 (q,  $^1J_{\text{CF}_3} = 270.7$  Hz,  $\text{CF}_3$ ), 125.5 (Ph C-2,6), 129.5 (Ph C-3,5), 130.3 (Ph C-4), 133.7 ( $^3J_{\text{C5,CHO}} = 3.3$  Hz, C-5), 136.1 (Ph C-1), 142.9 ( $^2J_{\text{C3,CF}_3} = 40.0$  Hz,  $^3J_{\text{C3,CHO}} = 2.0$  Hz, C-3), 181.1 ( $^1J = 183.9$  Hz, CHO) ppm.  $^{19}\text{F}$  NMR (470 MHz,  $\text{CDCl}_3$ ):  $\delta$  -61.9 ( $\text{CF}_3$ ) ppm. IR (KBr):  $\nu = 1700$  (C=O)  $\text{cm}^{-1}$ . EIMS,  $m/z$  (rel. int.): 276 (28), 275 (44), 274 (80)  $[\text{M}]^+$ , 273 (100), 255 (4), 245 (6), 209 (5), 136 (6), 77 (51), 51 (22).

## 3. General procedure for the preparation of alkynylaldehydes **4a-c**

Triethylamine (5.06 g, 6.95 mL, 50 mmol), the appropriate arylalkyne **3** (**3a**: ethynylbenzene, **3b**: 3-ethynylthiophene, **3c**: 1-hexyne) (15 mmol),  $\text{Pd}(\text{PPh}_3)_2\text{Cl}_2$  (701 mg, 1 mmol) and CuI (380 mg, 2 mmol) were added under argon atmosphere to a solution of pyrazole **2** (2.746 g, 10 mmol) in dry dimethylformamide (30 mL) and the reaction mixture was stirred at 80°C for 2 h. Then the solvents were evaporated under reduced pressure, the residue was dissolved in  $\text{CH}_2\text{Cl}_2$  (20 mL), water (40 mL) was added, and the mixture was extracted with  $\text{CH}_2\text{Cl}_2$  (3×30 mL). The combined organic layers were washed with brine and dried over anhydrous  $\text{Na}_2\text{SO}_4$ . The solvent was evaporated and the residue was purified by column chromatography ( $\text{SiO}_2$ , EtOAc/light petroleum 1:7) to afford compounds **4** as the less retarded fractions and occasionally small amounts of compounds **8** as the more retarded ones. For the synthesis of **4c** the reaction mixture was stirred at 50°C for 1.5 h and for the chromatographic separation the eluent acetone/*n*-hexane 1:10 was used.

### 3.1. 1-Phenyl-5-(phenylethynyl)-3-(trifluoromethyl)-1H-pyrazole-4-carbaldehyde (**4a**)

Yield: 2.824 g (83%); light brown crystals: mp 77–78 °C. <sup>1</sup>H NMR (500 MHz, CDCl<sub>3</sub>): δ 7.39 (m, 2H, CPh H-3,5), 7.45 (m, 1H, CPh H-4), 7.51 (m, 2H, CPh H-2,6), 7.52 (m, 1H, NPh H-4), 7.57 (m, 2H, NPh H-3,5), 7.82 (m, 2H, NPh H-2,6), 10.2 (q, *J* = 0.7 Hz, 1H, CHO) ppm. <sup>13</sup>C NMR (125 MHz, CDCl<sub>3</sub>): δ 75.4 (C≡CPh), 102.3 (<sup>3</sup>*J* = 5.5 Hz, C≡CPh), 120.2 (q, <sup>1</sup>*J*<sub>CF<sub>3</sub></sub> = 270.6 Hz, CF<sub>3</sub>), 120.4 (CPh C-1), 122.3 (<sup>2</sup>*J*<sub>C-4,CHO</sub> = 27.6 Hz, <sup>3</sup>*J*<sub>C-4,CF<sub>3</sub></sub> = 0.8 Hz, C-4), 124.1 (NPh C-2,6), 128.7 (CPh C-3,5), 129.3 (NPh C-3,5), 129.6 (NPh C-4), 130.4 (CPh C-4), 130.6 (<sup>3</sup>*J*<sub>C-5,CHO</sub> = 2.8 Hz, C-5), 132.0 (CPh C-2,6), 138.0 (NPh C-1), 142.0 (q, <sup>2</sup>*J*<sub>C-3,CF<sub>3</sub></sub> = 39.9 Hz, <sup>3</sup>*J*<sub>C-3,CHO</sub> = 2.9 Hz, C-3), 181.9 (<sup>1</sup>*J*<sub>CHO</sub> = 181.8 Hz, CHO) ppm. <sup>15</sup>N NMR (50 MHz, CDCl<sub>3</sub>): δ -159.0 (N-1) ppm, N-2 not detected. <sup>19</sup>F NMR (470 MHz, CDCl<sub>3</sub>): δ -61.6 (CF<sub>3</sub>) ppm. IR (KBr): ν = 2220 (C≡C), 1682 (C=O) cm<sup>-1</sup>. EIMS, *m/z* (rel. int.): 340 (33) [M]<sup>+</sup>, 339 (100) [M-H]<sup>+</sup>, 263 (34), 253 (20), 77 (60), 51 (31). HRMS (ESI), *m/z*: calcd. for C<sub>19</sub>H<sub>11</sub>F<sub>3</sub>N<sub>2</sub>O<sup>+</sup> 341.0896 [M+H]<sup>+</sup>; found 341.0895.

### 3.2. 1-Phenyl-5-(3-thienylethynyl)-3-(trifluoromethyl)-1H-pyrazole-4-carbaldehyde (**4b**)

Yield: 2.875 g (83%); light brown crystals; mp 100–102 °C. <sup>1</sup>H NMR (500 MHz, CDCl<sub>3</sub>): δ 7.17 (dd, <sup>3</sup>*J*<sub>Th H-4,Th H-5</sub> = 5.0 Hz, <sup>4</sup>*J*<sub>Th H-2,Th H-4</sub> = 1.2 Hz, 1H, Th H-4), 7.35 (dd, <sup>3</sup>*J*<sub>Th H-4,Th H-5</sub> = 5.0 Hz, <sup>4</sup>*J*<sub>Th H-2,Th H-5</sub> = 3.0 Hz, 1H, Th H-5), 7.51 (m, 1H, Ph H-4), 7.56 (m, 2H, Ph H-3,5), 7.65 (dd, <sup>4</sup>*J*<sub>Th H-2,Th H-5</sub> = 3.0 Hz, <sup>4</sup>*J*<sub>Th H-2,Th H-4</sub> = 1.2 Hz, 1H, Th H-2), 7.80 (m, 2H, Ph H-2,6), 10.15 (q, *J* = 0.8 Hz, 1H, CHO) ppm. <sup>13</sup>C NMR (125 MHz, CDCl<sub>3</sub>): δ 75.2 (s, C≡CTh), 97.7 (m, C≡CTh), 119.6 (<sup>2</sup>*J*<sub>Th C-3,Th H-2</sub> = 3.2 Hz, <sup>2</sup>*J*<sub>Th C-3,Th H-4</sub> = 5.0 Hz, <sup>3</sup>*J*<sub>Th C-3,Th H-5</sub> = 11.2 Hz, Th C-3), 120.2 (q, <sup>1</sup>*J*<sub>CF<sub>3</sub></sub> = 270.5 Hz, CF<sub>3</sub>), 122.3 (<sup>2</sup>*J*<sub>C-4,CHO</sub> = 27.6 Hz, <sup>3</sup>*J*<sub>C-4,CF<sub>3</sub></sub> = 0.8 Hz, C-4), 124.1 (Ph C-2,6), 126.3 (<sup>1</sup>*J*<sub>Th C-5,Th H-5</sub>, <sup>2</sup>*J*<sub>Th C-5,Th H-4</sub>, <sup>3</sup>*J*<sub>Th C-5,Th H-2</sub> = higher order, not detectable, Th C-5), 129.2 (Ph C-3,5), 129.46 (<sup>1</sup>*J*<sub>Th C-4,Th H-4</sub> = 171.7 Hz, <sup>2</sup>*J*<sub>Th C-4,Th H-5</sub> = 5.5 Hz, <sup>3</sup>*J*<sub>Th C-4,Th H-2</sub> = 8.2 Hz, Th C-4), 129.54 (Ph C-4), 130.6 (C-5), 132.1 (<sup>1</sup>*J*<sub>Th C-2,Th H-2</sub> = 188.9 Hz, <sup>3</sup>*J*<sub>Th C-2,Th H-4</sub> = 8.4 Hz, <sup>3</sup>*J*<sub>Th C-2,Th H-5</sub> = 4.8 Hz, Th C-2), 138.0 (Ph C-1), 142.0 (q, <sup>2</sup>*J*<sub>C-3,CF<sub>3</sub></sub> = 39.7 Hz, <sup>3</sup>*J*<sub>C-3,CHO</sub> = 2.9 Hz, C-3), 181.9 (<sup>1</sup>*J*<sub>CHO</sub> = 181.9 Hz, CHO) ppm. <sup>15</sup>N NMR (50 MHz, CDCl<sub>3</sub>): δ -159.1 (N-1) ppm, N-2 not detected. <sup>19</sup>F NMR (470 MHz, CDCl<sub>3</sub>): δ -61.5 (CF<sub>3</sub>) ppm. EIMS, *m/z* (rel. int.): 346 (48) [M]<sup>+</sup>, 345 (100) [M-H]<sup>+</sup>, 77 (20), 51 (30). HRMS (ESI), *m/z*: calcd. for C<sub>17</sub>H<sub>9</sub>F<sub>3</sub>N<sub>2</sub>O<sup>+</sup> 347.0460 [M+H]<sup>+</sup>; found 347.0462.

### 3.3. 5-(1-Hexyn-1-yl)-1-phenyl-3-(trifluoromethyl)-1H-pyrazole-4-carbaldehyde (**4c**)

Yield: 1.890 g (59%); brownish oil. <sup>1</sup>H NMR (400 MHz, CDCl<sub>3</sub>): δ 0.91 (t, *J* = 7.4 Hz, 3H, CH<sub>3</sub>CH<sub>2</sub>), 1.39 (m, 2H, CH<sub>2</sub>CH<sub>3</sub>), 1.57 (m, 2H, CH<sub>3</sub>CH<sub>2</sub>CH<sub>2</sub>), 2.49 (t, *J* = 7.0 Hz, 2H, C≡CCH<sub>2</sub>), 7.50 (m, 1H, Ph H-4), 7.52 (m, 2H, Ph H-3,5), 7.73 (m, 2H, Ph H-2,6), 10.6 (q, *J* = 0.7 Hz, 1H, CHO) ppm. <sup>13</sup>C NMR (100 MHz, CDCl<sub>3</sub>): δ 13.4 (CH<sub>3</sub>CH<sub>2</sub>), 19.4 (C≡CCH<sub>2</sub>), 21.9 (CH<sub>2</sub>CH<sub>3</sub>), 29.7 (CH<sub>2</sub>CH<sub>2</sub>CH<sub>3</sub>), 67.2 (<sup>3</sup>*J*<sub>C≡CCH<sub>2</sub></sub> = 4.4 Hz, C≡CCH<sub>2</sub>), 105.5 (C≡CCH<sub>2</sub>), 120.2 (q, <sup>1</sup>*J*<sub>CF<sub>3</sub></sub> = 270.4 Hz, CF<sub>3</sub>), 122.2 (<sup>2</sup>*J*<sub>C-4,CHO</sub> = 27.3 Hz, <sup>3</sup>*J*<sub>C-4,CF<sub>3</sub></sub> = 0.9 Hz, C-4), 124.2 (Ph C-2,6), 129.1 (Ph C-3,5), 129.4 (Ph C-4), 131.6 (C-5), 138.0 (Ph C-1), 141.6 (q, <sup>2</sup>*J*<sub>C-3,CF<sub>3</sub></sub> = 39.8 Hz, <sup>3</sup>*J*<sub>C-3,CHO</sub> = 3.4 Hz, C-3), 182.1 (<sup>1</sup>*J*<sub>CHO</sub> = 181.4 Hz, CHO) ppm. <sup>15</sup>N NMR (40 MHz,

CDCl<sub>3</sub>):  $\delta$  -158.8 (N-1) ppm, N-2 not detected. <sup>19</sup>F NMR (376 MHz, CDCl<sub>3</sub>):  $\delta$  -61.9 (CF<sub>3</sub>) ppm. EIMS, *m/z* (rel. int.): 320 (0.4) [M]<sup>+</sup>, 278 (20), 277 (53), 162 (36), 105 (54), 92 (22), 91 (100), 79 (42), 78 (45), 77 (58), 65 (20), 63 (21), 51 (20), 41 (37). HRMS (ESI), *m/z*: calcd. for C<sub>19</sub>H<sub>12</sub>F<sub>3</sub>N<sub>3</sub>H<sup>+</sup> 321.1209 [M+H]<sup>+</sup>; found 321.1210.

### 3.4. 5-(2-Oxo-2-phenylethyl)-1-phenyl-3-(trifluoromethyl)-1H-pyrazole-4-carbaldehyde (**8a**)

Yield: 286 mg (8%), brownish oil. <sup>1</sup>H NMR (500 MHz, CDCl<sub>3</sub>):  $\delta$  4.68 (s, 2H, CH<sub>2</sub>CO), 7.46 (m, 2H, NPh H-2,6), 7.48 (m, 3H, NPh H-3,4,5), 7.49 (m, 2H, CPh H-3,5), 7.62 (m, 1H, CPh H-4), 7.96 (m, 2H, CPh H-2,6), 10.09 (q, *J* = 0.9 Hz, 1H, CHO) ppm. <sup>13</sup>C NMR (125 MHz, CDCl<sub>3</sub>):  $\delta$  36.4 (CH<sub>2</sub>CO), 118.5 (<sup>2</sup>*J*<sub>C-4,CHO</sub> = 26.2 Hz, C-4), 120.9 (q, <sup>1</sup>*J*<sub>CF<sub>3</sub></sub> = 270.4 Hz, CF<sub>3</sub>), 125.8 (NPh C-2,6), 128.3 (CPh C-2,6), 128.8 (CPh C-3,5), 129.7 (NPh C-3,5), 130.2 (NPh C-4), 133.9 (CPh C-4), 135.8 (CPh C-1), 137.0 (NPh C-1), 142.8 (C-5), 143.6 (q, <sup>2</sup>*J*<sub>C-3,CF<sub>3</sub></sub> = 38.9 Hz, C-3), 184.3 (<sup>1</sup>*J*<sub>CHO</sub> = 181.6 Hz, <sup>4</sup>*J*<sub>CHO,CF<sub>3</sub></sub> = 1.7 Hz, CHO), 193.5 (CO) ppm. <sup>15</sup>N NMR (50 MHz, CDCl<sub>3</sub>):  $\delta$  -157.2 (N-1) ppm, N-2 not detected. <sup>19</sup>F NMR (470 MHz, CDCl<sub>3</sub>):  $\delta$  -59.5 (CF<sub>3</sub>) ppm. HRMS (ESI), *m/z*: calcd. for C<sub>19</sub>H<sub>13</sub>F<sub>3</sub>N<sub>3</sub>O<sub>2</sub>H<sup>+</sup> 359.1002 [M+H]<sup>+</sup>; found 359.1000.

### 3.5. 5-(2-Oxohexyl)-1-phenyl-3-(trifluoromethyl)-1H-pyrazole-4-carbaldehyde (**8c**)

Yield: 338 mg (10%), yellowish oil. <sup>1</sup>H-NMR (400 MHz, CDCl<sub>3</sub>):  $\delta$  0.90 (t, *J* = 7.1 Hz, 3H, CH<sub>3</sub>CH<sub>2</sub>), 1.28 (m, 2H, CH<sub>2</sub>CH<sub>3</sub>), 1.58 (m, 2H, CH<sub>3</sub>CH<sub>2</sub>CH<sub>2</sub>), 2.60 (m, 2H, COCH<sub>2</sub>CH<sub>2</sub>), 4.06 (s, 2H, CH<sub>2</sub>CO), 7.41 (m, 2H, Ph H-2,6), 7.52 (m, 3H, Ph H-3,4,5), 10.07 (q, *J* = 0.9 Hz, 1H, CHO) ppm. <sup>13</sup>C NMR (100 MHz, CDCl<sub>3</sub>):  $\delta$  13.7 (CH<sub>3</sub>CH<sub>2</sub>), 22.1 (CH<sub>2</sub>CH<sub>3</sub>), 25.5 (CH<sub>2</sub>CH<sub>2</sub>CH<sub>3</sub>), 39.8 (CH<sub>2</sub>CO), 42.9 (COCH<sub>2</sub>CH<sub>2</sub>), 118.2 (C-4), 120.8 (q, <sup>1</sup>*J*<sub>CF<sub>3</sub></sub> = 270.4 Hz, CF<sub>3</sub>), 125.9 (Ph C-2,6), 129.6 (Ph C-3,5), 130.2 (Ph C-4), 138.1 (Ph C-1), 142.6 (C-5), 143.5 (q, <sup>2</sup>*J*<sub>C3,CF<sub>3</sub></sub> = 38.9 Hz, C-3), 184.3 (CHO), 204.2 (CO). <sup>15</sup>N NMR (40 MHz, CDCl<sub>3</sub>):  $\delta$  -157.6 (N-1) ppm, N-2 not detected. <sup>19</sup>F NMR (376 MHz, CDCl<sub>3</sub>):  $\delta$  -59.6 (d, *J* = 0.9 Hz, CF<sub>3</sub>) ppm. HRMS (ESI), *m/z*: calcd. for C<sub>17</sub>H<sub>17</sub>F<sub>3</sub>N<sub>2</sub>O<sub>2</sub>H<sup>+</sup> 339.1315 [M+H]<sup>+</sup>; found 339.1313.

## 4. General procedure for the preparation of pyrazolo[4,3-*c*]pyridines **5a-c**

Method A: The appropriate 5-alkynylpyrazole **4a-c** (1 mmol) was dissolved in dimethylformamide (12 mL) and *tert*-butylamine (730 mg, 10 mmol) was added. The reaction was performed under microwave irradiation conditions with an Anton Paar Synthos 3000 reactor and P-Program (800 W, p-Rate 2.0 bar s<sup>-1</sup>, IR: 150°C, p: 80 bar for 2 h). After completion, the solvents were removed under reduced pressure and the residue was purified by column chromatography (SiO<sub>2</sub>, EtOAc/light petroleum 1:10).

Method B: Pyrazole **2** (275 mg, 1 mmol) was dissolved in dimethylformamide (12 mL). The appropriate arylacetylene **3a-c** (2 mmol), Pd(PPh<sub>3</sub>)<sub>2</sub>Cl<sub>2</sub> (42 mg, 0.06 mmol) and *tert*-butylamine (730 mg, 10 mmol) were added under argon. The reaction was performed under

microwave irradiation conditions with an Anton Paar Synthos 3000 reactor and P-Program (800 W, p-Rate 2.0 bar s<sup>-1</sup>, IR: 150°C, p: 80 bar for 2 h). After completion, the solvents were removed under reduced pressure and the residue was purified by column chromatography (SiO<sub>2</sub>, EtOAc/light petroleum 1:10).

Method C: A mixture of **8** (0.3 mmol) and ammonium acetate (150 mg, 1.93 mmol) in acetic acid (5 mL) was heated at 80 °C for 1 h with stirring. After the solution reached room temperature it was poured onto ice-water (20 mL). The mixture was exhaustively extracted with EtOAc, the combined organic phases were washed with H<sub>2</sub>O and brine and dried over anhydrous Na<sub>2</sub>SO<sub>4</sub>. The solvents were removed under reduced pressure and the residue was subjected to column chromatography (SiO<sub>2</sub>, EtOAc/light petroleum 1:10).

#### 4.1. 1,6-Diphenyl-3-(trifluoromethyl)-1H-pyrazolo[4,3-c]pyridine (**5a**)

Yield: method A: 240 mg (71%), method B: 300 mg (89%), method C: 72 mg (71%); yellow crystals; mp 121–123 °C. <sup>1</sup>H NMR (500 MHz, CDCl<sub>3</sub>): δ 7.45 (m, 1H, CPh H-4), 7.51 (m, 2H, CPh H-3,5), 7.52 (m, 1H, NPh H-4), 7.63 (m, 2H, NPh H-3,5), 7.74 (m, 2H, NPh H-2,6), 7.96 (d, *J* = 1.1 Hz, 1H, H-7), 8.04 (m, 2H, CPh H-2,6), 9.34 (s, 1H, H-4). <sup>13</sup>C NMR (125 MHz, CDCl<sub>3</sub>): δ 101.4 (<sup>1</sup>*J*<sub>C-7,H-7</sub> = 166.7 Hz, <sup>4</sup>*J*<sub>C-7,H-4</sub> = 1.8 Hz, C-7), 117.4 (C-3a), 121.2 (q, <sup>1</sup>*J*<sub>CF<sub>3</sub></sub> = 269.6 Hz, CF<sub>3</sub>), 123.4 (NPh C-2,6), 127.4 (CPh C-2,6), 128.6 (NPh C-4), 128.9 (CPh C-3,5), 129.3 (CPh C-4), 129.9 (NPh C-3,5), 136.7 (q, <sup>2</sup>*J*<sub>C-3,CF<sub>3</sub></sub> = 39.7 Hz, <sup>3</sup>*J*<sub>C-3,H-4</sub> = 0.9 Hz, C-3), 138.2 (NPh C-1), 138.9 (CPh C-1), 144.1 (<sup>2</sup>*J*<sub>C-7a,H-7</sub> = 1.1 Hz, <sup>3</sup>*J*<sub>C-7a,H-4</sub> = 6.2 Hz, C-7a), 144.5 (<sup>1</sup>*J*<sub>C-4,H-4</sub> = 185.8 Hz, C-4), 154.9 (C-6). <sup>15</sup>N NMR (50 MHz, CDCl<sub>3</sub>): δ -184.5 (N-1), -84.1 (N-5) ppm, N-2 not detected. <sup>19</sup>F NMR (470 MHz, CDCl<sub>3</sub>): δ -60.8 (d, *J* = 0.9 Hz, CF<sub>3</sub>). EIMS, *m/z* (rel. int.): 340 (21), 339 (100) [M]<sup>+</sup>, 338 (81) [M-H]<sup>+</sup>, 270 (23). HRMS (ESI), *m/z*: calcd. for C<sub>19</sub>H<sub>12</sub>F<sub>3</sub>N<sub>3</sub>H<sup>+</sup> 340.1056 [M+H]<sup>+</sup>; found 340.1059.

#### 4.2. 1-Phenyl-6-(3-thienyl)-3-(trifluoromethyl)-1H-pyrazolo[4,3-c]pyridine (**5b**)

Yield: method A: 180 mg (52%), method B: 175 mg (51%); light brown crystals; mp 118–121 °C. <sup>1</sup>H NMR (400 MHz, CDCl<sub>3</sub>): δ 7.42 (dd, <sup>3</sup>*J*<sub>Th H-4,Th H-5</sub> = 5.1 Hz, <sup>4</sup>*J*<sub>Th H-2,Th H-5</sub> = 3.1 Hz, 1H, Th H-5), 7.52 (m, 1H, Ph H-4), 7.63 (m, 2H, Ph H-3,5), 7.67 (dd, <sup>3</sup>*J*<sub>Th H-4,Th H-5</sub> = 5.1, <sup>4</sup>*J*<sub>Th H-2,Th H-4</sub> = 1.3 Hz, 1H, Th H-4), 7.73 (m, 2H, Ph H-2,6), 7.82 (d, *J* = 1.2 Hz, 1H, H-7), 8.04 (dd, <sup>4</sup>*J*<sub>Th H-2,Th H-5</sub> = 3.1 Hz, <sup>4</sup>*J*<sub>Th H-2,Th H-4</sub> = 1.3 Hz, 1H, Th H-2), 9.26 (qd, *J* = 1.2, 0.9 Hz, 1H, H-4). <sup>13</sup>C NMR (100 MHz, CDCl<sub>3</sub>): δ 100.6 (<sup>1</sup>*J*<sub>C-7,H-7</sub> = 166.6 Hz, <sup>4</sup>*J*<sub>C-7,H-4</sub> = 1.8 Hz, C-7), 117.2 (C-3a), 121.2 (q, <sup>1</sup>*J*<sub>CF<sub>3</sub></sub> = 269.7 Hz, CF<sub>3</sub>), 123.4 (Ph C-2,6), 124.7 (<sup>1</sup>*J*<sub>Th C-2,Th H-2</sub> = 185.8 Hz, <sup>3</sup>*J*<sub>Th C-2,Th H-4</sub> = 8.6 Hz, <sup>3</sup>*J*<sub>Th C-2,Th H-5</sub> = 4.6 Hz, Th C-2), 126.1 (<sup>1</sup>*J*<sub>Th C-4,Th H-4</sub> = 167.2 Hz, <sup>2</sup>*J*<sub>Th C-4,Th H-5</sub> = 5.1 Hz, <sup>3</sup>*J*<sub>Th C-4,Th H-2</sub> = 8.5 Hz, Th C-4), 126.7 (<sup>1</sup>*J*<sub>Th C-5,Th H-5</sub> = 185.7 Hz, <sup>2</sup>*J*<sub>Th C-5,Th H-4</sub> = 7.7 Hz, <sup>3</sup>*J*<sub>Th C-5,Th H-2</sub> = 6.0 Hz, Th C-5), 128.6 (Ph C-4), 129.9 (Ph C-3,5), 136.8 (q, <sup>2</sup>*J*<sub>C-3,CF<sub>3</sub></sub> = 39.8 Hz, C-3), 138.3 (Ph C-1), 141.5 (Th C-3), 144.0 (C-7a), 144.6 (<sup>1</sup>*J*<sub>C-4,H-4</sub> = 185.6 Hz, <sup>4</sup>*J*<sub>C-4,H-7</sub> = 1.3 Hz, <sup>4</sup>*J*<sub>C-4,CF<sub>3</sub></sub> = 0.9 Hz, C-4), 150.7 (C-6). <sup>15</sup>N NMR (40 MHz, CDCl<sub>3</sub>): δ -184.6 (N-1), -85.1 (N-5) ppm, N-2 not detected. <sup>19</sup>F NMR (376 MHz, CDCl<sub>3</sub>): δ -60.8 (d, *J* = 0.9 Hz,

$CF_3$ ). EIMS,  $m/z$  (rel. int.): 346 (23), 345 (100)  $[M]^+$ , 344 (33)  $[M-H]^+$ , 339 (21), 77 (20). HRMS (ESI),  $m/z$ : calcd. for  $C_{17}H_{10}F_3N_3SH^+$  346.0620  $[M+H]^+$ ; found 346.0621.

#### 4.3. 6-Butyl-1-phenyl-3-(trifluoromethyl)-1H-pyrazolo[4,3-c]pyridine (**5c**)

Yield: method B: 294 mg (92%), method C: 67 mg (70%); brownish oil.  $^1H$  NMR (500 MHz,  $CDCl_3$ ):  $\delta$  0.94 (t,  $J = 7.4$  Hz, 3H,  $CH_3CH_2$ ), 1.40 (m, 2H,  $CH_2CH_3$ ), 1.76 (m, 2H,  $CH_3CH_2CH_2$ ), 2.94 (m, 2H,  $CCH_2$ ), 7.43 (s, 1H, H-7), 7.48 (m, 1H, Ph H-4), 7.59 (m, 2H, Ph H-3,5), 7.69 (m, 2H, Ph H-2,6), 9.19 (s, 1H, H-4).  $^{13}C$  NMR (125 MHz,  $CDCl_3$ ):  $\delta$  13.9 ( $CH_3CH_2$ ), 22.5 ( $CH_2CH_3$ ), 32.2 ( $CH_2CH_2CH_3$ ), 38.4 ( $CCH_2$ ), 103.1 ( $^1J_{C-7,H-7} = 166.6$  Hz, C-7), 116.8 (C-3a), 121.2 (q,  $^1J_{CF_3} = 269.6$  Hz,  $CF_3$ ), 123.2 (Ph C-2,6), 128.4 (Ph C-4), 129.8 (Ph C-3,5), 136.6 (q,  $^2J_{C-3,CF_3} = 39.7$  Hz, C-3), 138.3 (Ph C-1), 143.8 ( $^3J_{C-7a,H-4} = 6.3$  Hz, C-7a), 144.2 ( $^1J_{C-4,H-4} = 184.8$  Hz, C-4), 159.7 (C-6).  $^{15}N$  NMR (50 MHz,  $CDCl_3$ ):  $\delta$  -185.9 (N-1), -80.8 (N-5) ppm, N-2 not detected.  $^{19}F$  NMR (470 MHz,  $CDCl_3$ ):  $\delta$  -60.8 (d,  $J = 0.8$  Hz,  $CF_3$ ). EIMS,  $m/z$  (rel. int.): 319 (1.4)  $[M]^+$ , 278 (16), 277 (100), 77 (23). HRMS (ESI),  $m/z$ : calcd. for  $C_{17}H_{16}F_3N_3H^+$  320.1369  $[M+H]^+$ ; found 320.1371.

### 5. General procedure for the preparation of oximes **6a-c**

The appropriate pyrazole aldehyde **4a-c** (1 mmol) was dissolved in EtOH (5 mL) and hydroxylamine hydrochloride (70 mg, 1 mmol) and sodium acetate (136 mg, 1 mmol) were added. The reaction mixture was stirred at room temperature for 1 h, then it was poured into ice-cold water. The solid product was filtered off and purified by column chromatography ( $SiO_2$ , EtOAc/light petroleum 1:5).

#### 5.1. (E)-1-Phenyl-5-(phenylethynyl)-3-(trifluoromethyl)-1H-pyrazole-4-carbaldehyde oxime (**6a**)

Yield 282 mg (79%); light yellow, crystals; mp 128–130 °C.  $^1H$  NMR (500 MHz,  $CDCl_3$ ):  $\delta$  7.35 (m, 2H, CPh H-3,5), 7.40 (m, 1H, CPh H-4), 7.46 (m, 2H, CPh H-2,6), 7.48 (m, 1H, NPh H-4), 7.54 (m, 2H, NPh H-3,5), 7.81 (m, 2H, NPh H-2,6), 8.29 (s, 1H, NCH), 8.92 (br s, 1H, OH).  $^{13}C$  NMR (125 MHz,  $CDCl_3$ ):  $\delta$  76.4 (s,  $C\equiv CPh$ ), 101.3 (m,  $C\equiv CPh$ ), 116.3 ( $^2J_{C-4,NCH} = 7.3$  Hz,  $^3J_{C-4,CF_3} = 1.1$  Hz, C-4), 120.7 (q,  $^1J_{CF_3} = 269.8$  Hz,  $CF_3$ ), 121.0 (CPh C-1), 124.1 (NPh C-2,6), 126.1 ( $^3J_{C-5,NCH} = 4.7$  Hz, C-5), 128.5 (CPh C-3,5), 129.07 (NPh C-4), 129.1 (NPh C-3,5), 129.8 (CPh C-4), 131.7 (CPh C-2,6), 138.5 (NPh C-1), 140.1 (q,  $^2J_{C-3,CF_3} = 38.5$  Hz,  $^3J_{C-3,NCH} = 3.5$  Hz, C-3), 140.4 (NCH).  $^{15}N$  NMR (50 MHz,  $CDCl_3$ ):  $\delta$  -160.0 (N-1), -15.6 (NOH) ppm, N-2 not detected.  $^{19}F$  NMR (470 MHz,  $CDCl_3$ ):  $\delta$  -61.7 ( $CF_3$ ). EIMS,  $m/z$  (rel. int.): 355 (12)  $[M]^+$ , 354 (23)  $[M-H]^+$ , 339 (27), 338 (50), 269 (27), 268 (23), 77 (100), 69 (59), 51 (44). HRMS (ESI),  $m/z$ : calcd. for  $C_{19}H_{12}F_3N_3OH^+$  356.1005  $[M+H]^+$ ; found 356.1003.

5.2. (E)-1-Phenyl-5-(3-thienylethynyl)-3-(trifluoromethyl)-1H-pyrazole-4-carbaldehyde oxime (**6b**)

Yield 221 mg (61%); light brown crystals; mp 115–117 °C. <sup>1</sup>H NMR (500 MHz, CDCl<sub>3</sub>): δ 7.13 (m, <sup>3</sup>J<sub>Th H-4,Th H-5</sub> = 5.0, <sup>4</sup>J<sub>Th H-2,Th H-4</sub> = 1.2 Hz, 1H, Th H-4), 7.31 (m, <sup>3</sup>J<sub>Th H-4,Th H-5</sub> = 5.0 Hz, <sup>4</sup>J<sub>Th H-2,Th H-5</sub> = 3.0 Hz, 1H, Th H-5), 7.48 (m, 1H, Ph H-4), 7.53 (m, 2H, Ph H-3,5), 7.59 (m, <sup>4</sup>J<sub>Th H-2,Th H-5</sub> = 3.0 Hz, <sup>4</sup>J<sub>Th H-2,Th H-4</sub> = 1.2 Hz, 1H, Th H-2), 7.78 (m, 2H, Ph H-2,6), 8.28 (s, 1H, NCH), 9.20 (br s, NOH). <sup>13</sup>C NMR (125 MHz, CDCl<sub>3</sub>): δ 76.1 (s, C≡CTh), 96.8 (m, C≡CTh), 116.1 (<sup>2</sup>J<sub>C-4,NCH</sub> = 7.4 Hz, <sup>3</sup>J<sub>C-4,CF<sub>3</sub></sub> = 1.1 Hz, C-4), 120.1 (<sup>2</sup>J<sub>Th C-3,Th H-2</sub> = 3.2 Hz, <sup>2</sup>J<sub>Th C-3,Th H-4</sub> = 4.9 Hz, <sup>3</sup>J<sub>Th C-3,Th H-5</sub> = 11.1 Hz, Th C-3), 120.7 (q, <sup>1</sup>J<sub>CF<sub>3</sub></sub> = 269.8 Hz, CF<sub>3</sub>), 124.1 (Ph C-2,6), 125.9 (<sup>1</sup>J<sub>Th C-5,Th H-5</sub> = 189.2 Hz, <sup>2</sup>J<sub>Th C-5,Th H-4</sub> = 5.9 Hz, <sup>3</sup>J<sub>Th C-5,Th H-2</sub> = 5.9 Hz, Th C-5), 126.0 (<sup>3</sup>J<sub>C-5,NCH</sub> = 4.8 Hz, C-5) 129.1 (Ph C-3,4,5), 129.5 (<sup>1</sup>J<sub>Th C-4,Th H-4</sub> = 171.1 Hz, <sup>2</sup>J<sub>Th C-4,Th H-5</sub> = 6.0 Hz, <sup>3</sup>J<sub>Th C-4,Th H-2</sub> = 8.3 Hz, Th C-4), 131.2 (<sup>1</sup>J<sub>Th C-2,Th H-2</sub> = 188.9 Hz, <sup>3</sup>J<sub>Th C-2,Th H-4</sub> = 8.4 Hz, <sup>3</sup>J<sub>Th C-2,Th H-5</sub> = 4.8 Hz, Th C-2), 138.5 (Ph C-1), 140.2 (q, <sup>2</sup>J<sub>C-3,CF<sub>3</sub></sub> = 38.3 Hz, <sup>3</sup>J<sub>C-3,NCH</sub> = 3.3 Hz, C-3), 140.3 (NCH). <sup>15</sup>N NMR (50 MHz, CDCl<sub>3</sub>): δ -159.9 (N-1), -16.9 (NOH) ppm, N-2 not detected. <sup>19</sup>F NMR (470 MHz, CDCl<sub>3</sub>): δ -61.6 (CF<sub>3</sub>). EIMS, *m/z* (rel. int.): 361 (17) [M]<sup>+</sup>, 345 (30), 344 (100), 275 (47), 274 (32), 77 (49). HRMS (ESI), *m/z*: calcd. for C<sub>17</sub>H<sub>10</sub>F<sub>3</sub>N<sub>3</sub>OSH<sup>+</sup> 362.0569 [M+H]<sup>+</sup>; found 362.0569.

5.3. (E)-1-[5-(1-Hexyn-1-yl)-1-phenyl-3-(trifluoromethyl)-1H-pyrazole-4-carbaldehyde oxime (**6c**)

Yield 209 mg (64%); light brown crystals; mp 70–71 °C. <sup>1</sup>H NMR (400 MHz, CDCl<sub>3</sub>): δ 0.89 (t, *J* = 7.3 Hz, 3H, CH<sub>3</sub>CH<sub>2</sub>), 1.37 (m, 2H, CH<sub>2</sub>CH<sub>3</sub>), 1.54 (m, 2H, CH<sub>3</sub>CH<sub>2</sub>CH<sub>2</sub>), 2.46 (t, *J* = 7.1 Hz, 2H, C≡CCH<sub>2</sub>), 7.46 (m, 1H, Ph H-4), 7.49 (m, 2H, Ph H-3,5), 7.72 (m, 2H, Ph H-2,6), 8.18 (s, 1H, NOH), 8.21 (q, *J* = 0.5 Hz, 1H, NCH). <sup>13</sup>C NMR (100 MHz, CDCl<sub>3</sub>): δ 13.5 (CH<sub>3</sub>CH<sub>2</sub>), 19.4 (C≡CCH<sub>2</sub>), 21.9 (CH<sub>2</sub>CH<sub>3</sub>), 29.8 (CH<sub>2</sub>CH<sub>2</sub>CH<sub>3</sub>), 68.1 (C≡CCH<sub>2</sub>), 104.0 (C≡CCH<sub>2</sub>), 115.9 (C-4), 120.8 (q, <sup>1</sup>J<sub>CF<sub>3</sub></sub> = 296.9 Hz, CF<sub>3</sub>), 124.1 (Ph C-2,6), 126.9 (C-5), 128.9 (Ph C-4), 129.0 (Ph C-3,5), 138.6 (Ph C-1), 139.9 (q, <sup>2</sup>J<sub>C-3,CF<sub>3</sub></sub> = 38.5 Hz, C-3), 140.7 (<sup>1</sup>J<sub>NCH</sub> = 168.8 Hz, NCH). <sup>15</sup>N NMR (40 MHz, CDCl<sub>3</sub>): δ -160.2 (N-1), -15.3 (NOH) ppm, N-2 not detected. <sup>19</sup>F NMR (376 MHz, CDCl<sub>3</sub>): δ -61.9 (d, *J* = 0.5 Hz, CF<sub>3</sub>). EIMS, *m/z* (rel. int.): 335 (11) [M]<sup>+</sup>, 293 (74), 277 (32), 276 (100), 77 (25). HRMS (ESI), *m/z*: calcd. for C<sub>17</sub>H<sub>16</sub>F<sub>3</sub>N<sub>3</sub>OH<sup>+</sup> 336.1318 [M+H]<sup>+</sup>; found 336.1323.

6. General procedure for the preparation of pyrazolo[4,3-*c*]pyridine 5-oxides **7a-c**

Method A: AgOTf (13 mg, 0.05 mmol) was added to a solution of the appropriate pyrazole oxime **6a-c** (1 mmol) in dichloromethane (5 mL) and the reaction mixture was stirred at room temp. for 1.5 h. The mixture was directly loaded onto a silica gel column and eluted with dichloromethane/methanol 9:1.

Method B: A mixture of oxime **9** (145 mg, 0.5 mmol), the appropriate alkyne **3** (0.6 mmol), Pd(OAc)<sub>2</sub> (5 mol %), PPh<sub>3</sub> (20 mol %), K<sub>2</sub>CO<sub>3</sub> (276 mg, 3 mmol) in anhydrous DMF (6 mL) was treated under microwave irradiation (100 W) for 1 h at 80 °C. Then the solvent

was evaporated under reduced pressure, the residue was dissolved in dichloromethane (30 mL), water (20 mL) was added, and the mixture was extracted with dichloromethane (3×30 mL). The combined organic layers were washed with brine and dried over anhydrous Na<sub>2</sub>SO<sub>4</sub>. The solvent was evaporated and the residue was purified by column chromatography (SiO<sub>2</sub>, acetone/light petroleum 1:4).

### 6.1. 1,6-Diphenyl-3-(trifluoromethyl)-1H-pyrazolo[4,3-c]pyridine 5-oxide (7a)

Yield: method A: 336 mg (94%), method B: 53 mg (30%); colorless crystals; mp 126–128 °C. <sup>1</sup>H NMR (500 MHz, CDCl<sub>3</sub>): δ 7.50 (m, 3H, CPh H-3,4,5), 7.51 (m, 1H, NPh H-4), 7.60 (m, 2H, NPh H-3,5), 7.69 (m, 2H, NPh H-2,6), 7.70 (d, *J* = 0.7 Hz, 1H, H-7), 7.75 (m, 2H, CPh H-2,6), 8.99 (t, *J* = 0.8 Hz, 1H, H-4). <sup>13</sup>C NMR (125 MHz, CDCl<sub>3</sub>): δ 108.8 (<sup>1</sup>*J*<sub>C-7,H-7</sub> = 170.9 Hz, <sup>4</sup>*J*<sub>C-7,H-4</sub> = 1.2 Hz, C-7), 118.2 (C-3a), 120.7 (q, <sup>1</sup>*J*<sub>CF<sub>3</sub></sub> = 269.6 Hz, CF<sub>3</sub>), 123.2 (NPh C-2,6), 128.4 (CPh C-3,5), 129.1 (NPh C-4), 129.6 (CPh C-2,6), 130.0 (CPh C-4), 130.1 (NPh C-3,5), 131.5 (C-4), 132.6 (CPh C-1), 134.8 (q, <sup>2</sup>*J*<sub>C-3,CF<sub>3</sub></sub> = 40.3 Hz, <sup>3</sup>*J*<sub>C-3,H-4</sub> = 1.7 Hz, C-3), 135.6 (<sup>2</sup>*J*<sub>C-7a,H-7</sub> = 1.8 Hz, <sup>3</sup>*J*<sub>C-7a,H-4</sub> = 7.1 Hz, C-7a), 149.9 (C-6). <sup>15</sup>N NMR (50 MHz, CDCl<sub>3</sub>): δ -182.2 (N-1), -99.7 (N-5) ppm, N-2 not detected. <sup>19</sup>F NMR (470 MHz, CDCl<sub>3</sub>): δ -61.0 (d, *J* = 0.8 Hz, CF<sub>3</sub>). EIMS, *m/z* (rel. int.): 355 (73), 354 (100), 327 (22), 326 (29), 301 (39), 77 (25). HRMS (ESI), *m/z*: calcd. for C<sub>19</sub>H<sub>12</sub>F<sub>3</sub>N<sub>3</sub>OH<sup>+</sup> 356.1005 [M+H]<sup>+</sup>; found 356.1009

### 6.2. 1-Phenyl-6-(3-thienyl)-3-(trifluoromethyl)-1H-pyrazolo[4,3-c]pyridine 5-oxide (7b)

Yield: method A: 306 mg (85%), method B: 51 mg (28%); light brown crystals; mp 179–181 °C. <sup>1</sup>H NMR (500 MHz, CDCl<sub>3</sub>): δ 7.42 (dd, <sup>3</sup>*J*<sub>Th H-4,Th H-5</sub> = 5.1, <sup>4</sup>*J*<sub>Th H-2,Th H-5</sub> = 3.1 Hz, 1H, Th H-5), 7.53 (m, 1H, Ph H-4), 7.62 (dd, <sup>3</sup>*J*<sub>Th H-4,Th H-5</sub> = 5.1, <sup>4</sup>*J*<sub>Th H-2,Th H-4</sub> = 1.3 Hz, 1H, Th H-4), 7.63 (m, 2H, Ph H-3,5), 7.69 (m, 2H, Ph H-2,6), 7.86 (d, *J* = 0.7 Hz, 1H, H-7), 8.48 (dd, <sup>4</sup>*J*<sub>Th H-2,Th H-5</sub> = 3.1, <sup>4</sup>*J*<sub>Th H-2,Th H-4</sub> = 1.3 Hz, 1H, Th H-2), 8.98 (quint, *J* = 0.7 Hz, 1H, H-4). <sup>13</sup>C NMR (125 MHz, CDCl<sub>3</sub>): δ 106.8 (<sup>1</sup>*J*<sub>C-7,H-7</sub> = 170.0 Hz, <sup>4</sup>*J*<sub>C-7,H-4</sub> = 1.2 Hz, C-7), 117.5 (C-3a), 120.7 (q, <sup>1</sup>*J*<sub>CF<sub>3</sub></sub> = 269.5 Hz, <sup>4</sup>*J*<sub>CF<sub>3</sub>,H-4</sub> = 0.7 Hz, CF<sub>3</sub>), 123.2 (Ph C-2,6), 125.5 (<sup>1</sup>*J*<sub>Th C-5,Th H-5</sub> = 186.8 Hz, <sup>2</sup>*J*<sub>Th C-5,Th H-4</sub> = 7.4 Hz, <sup>3</sup>*J*<sub>Th C-5,Th H-2</sub> = 6.0 Hz, Th C-5), 127.8 (<sup>1</sup>*J*<sub>Th C-4,Th H-4</sub> = 169.6 Hz, <sup>2</sup>*J*<sub>Th C-4,Th H-5</sub> = 5.4 Hz, <sup>3</sup>*J*<sub>Th C-4,Th H-2</sub> = 8.5 Hz, Th C-4), 129.1 (Ph C-4), 129.5 (<sup>1</sup>*J*<sub>Th C-2,Th H-2</sub> = 190.2 Hz, <sup>3</sup>*J*<sub>Th C-2,Th H-4</sub> = 8.4 Hz, <sup>3</sup>*J*<sub>Th C-2,Th H-5</sub> = 4.5 Hz, Th C-2), 130.1 (Ph C-3,5), 131.8 (<sup>1</sup>*J*<sub>C-4,H-4</sub> = 192.2 Hz, C-4), 132.0 (Th C-3), 134.7 (q, <sup>2</sup>*J*<sub>C-3,CF<sub>3</sub></sub> = 40.3 Hz, <sup>3</sup>*J*<sub>C-3,H-4</sub> = 1.9 Hz, C-3), 135.6 (<sup>2</sup>*J*<sub>C-7a,H-7</sub> = 2.1 Hz, <sup>3</sup>*J*<sub>C-7a,H-4</sub> = 7.2 Hz, C-7a), 137.8 (Ph C-1), 144.9 (C-6). <sup>15</sup>N NMR (50 MHz, CDCl<sub>3</sub>): δ -183.0 (N-1), -101.0 (N-5) ppm, N-2 not detected. <sup>19</sup>F NMR (470 MHz, CDCl<sub>3</sub>): δ -61.0 (d, *J* = 0.85 Hz, CF<sub>3</sub>). EIMS, *m/z* (rel. int.): 362 (20), 361 (100) [M]<sup>+</sup>, 333 (23), 332 (85), 328 (31), 288 (97), 77 (38). HRMS (ESI), *m/z*: calcd. for C<sub>17</sub>H<sub>10</sub>F<sub>3</sub>N<sub>3</sub>OSH<sup>+</sup> 362.0569 [M+H]<sup>+</sup>; found 362.0574.



### 6.3. 6-Butyl-1-phenyl-3-(trifluoromethyl)-1H-pyrazolo[4,3-c]pyridine 5-oxide (7c)

Yield: method A: 284 mg (85%); brownish oil.  $^1\text{H}$  NMR (400 MHz,  $\text{CDCl}_3$ ):  $\delta$  0.98 (t,  $J = 7.3$  Hz, 3H,  $\text{CH}_3\text{CH}_2$ ), 1.48 (m, 2H,  $\text{CH}_2\text{CH}_3$ ), 1.74 (m, 2H,  $\text{CH}_3\text{CH}_2\text{CH}_2$ ), 3.04 (m, 2H,  $\text{CCH}_2$ ), 7.52 (m, 2H, H-7, Ph H-4), 7.62 (m, 2H, Ph H-3,5), 7.67 (m, 2H, Ph H-2,6), 8.92 (s, 1H, H-4).  $^{13}\text{C}$  NMR (100 MHz,  $\text{CDCl}_3$ ):  $\delta$  13.8 ( $\text{CH}_3\text{CH}_2$ ), 22.5 ( $\text{CH}_2\text{CH}_3$ ), 28.8 ( $\text{CH}_2\text{CH}_2\text{CH}_3$ ), 31.2 ( $\text{CCH}_2$ ), 106.2 ( $^1J_{\text{C-7,H-7}} = 169.3$  Hz, C-7), 117.4 (C-3a), 120.7 (q,  $^1J_{\text{CF}_3} = 269.6$  Hz,  $\text{CF}_3$ ), 123.2 (Ph C-2,6), 129.0 (Ph C-4), 131.0 ( $^1J_{\text{C-4,H-4}} = 191.3$  Hz, C-4), 130.1 (Ph C-3,5), 134.8 (q,  $^2J_{\text{C-3,CF}_3} = 40.2$  Hz, C-3), 135.6 ( $^2J_{\text{C-7a,H-7}} = 1.7$  Hz,  $^3J_{\text{C-7a,H-4}} = 7.2$  Hz, C-7a), 137.8 (Ph C-1), 153.2 (C-6).  $^{15}\text{N}$  NMR (40 MHz,  $\text{CDCl}_3$ ):  $\delta$  -183.5 (N-1), -99.1 (N-5) ppm, N-2 not detected.  $^{19}\text{F}$  NMR (376 MHz,  $\text{CDCl}_3$ ):  $\delta$  -61.1 (d,  $J = 0.9$  Hz,  $\text{CF}_3$ ). EIMS,  $m/z$  (rel. int.): 335 (12)  $[\text{M}]^+$ , 318 (23), 293 (100), 277 (71), 276 (95), 77 (31), 43 (20). HRMS (ESI),  $m/z$ : calcd. for  $\text{C}_{17}\text{H}_{16}\text{F}_3\text{N}_3\text{OH}^+$  336.1318  $[\text{M}+\text{H}]^+$ ; found 336.1321.

### 6.4. (E)-1-[5-Chloro-1-phenyl-3-(trifluoromethyl)-1H-pyrazol-4-yl]-N-hydroxymethanimine (9)

Carbaldehyde **2** (275 mg, 1 mmol) was dissolved in EtOH (5 mL) and hydroxylamine hydrochloride (70 mg, 1 mmol) and sodium acetate (136 mg, 1 mmol) were added. The reaction mixture was stirred at room temperature for 1 h, then it was poured into ice-cold water. The solid product was filtered off and purified by column chromatography ( $\text{SiO}_2$ , EtOAc/light petroleum 1:5) to afford 223 mg (77%) of colorless crystals of mp 161-162 °C.  $^1\text{H}$  NMR (400 MHz,  $\text{CDCl}_3$ ):  $\delta$  7.50–7.58 (m, 5H, Ph H), 8.19 (s, 1H, NCH), 8.74 (m, 1H, OH) ppm.  $^{13}\text{C}$  NMR (100 MHz,  $\text{CDCl}_3$ ):  $\delta$  110.7 ( $^2J_{\text{C-4,NCH}} = 7.3$  Hz,  $^3J_{\text{C-4,CF}_3} = 0.9$  Hz, C-4), 120.5 (q,  $^1J_{\text{CF}_3} = 270.2$  Hz,  $\text{CF}_3$ ), 125.4 (Ph C-2,6), 128.6 (C-5), 129.4 (Ph C-3,5), 129.8 (Ph C-4), 136.8 (Ph C-1), 139.7 ( $^1J_{\text{NCH}} = 169.9$  Hz,  $^2J_{\text{NCH,OH}} = 10.2$  Hz, NCH), 140.7 ( $^2J_{\text{C-3,CF}_3} = 38.8$  Hz,  $^3J_{\text{C3,NCH}} = 3.2$  Hz, C-3) ppm.  $^{15}\text{N}$  NMR (40 MHz,  $\text{CDCl}_3$ ):  $\delta$  -164.3 (N-1), -15.8 (NOH) ppm, N-2 not detected.  $^{19}\text{F}$  NMR (376 MHz,  $\text{CDCl}_3$ ):  $\delta$  -62.3 ( $\text{CF}_3$ ) ppm.
